# Supplementary material
Source: Springer Nature journal article supplement (https://www.springerprofessional.de/resource/supplementary/13638_2011_141_MOESM5_ESM.pdf/11897132)
Supplement: MOESM5 [file 11897132]

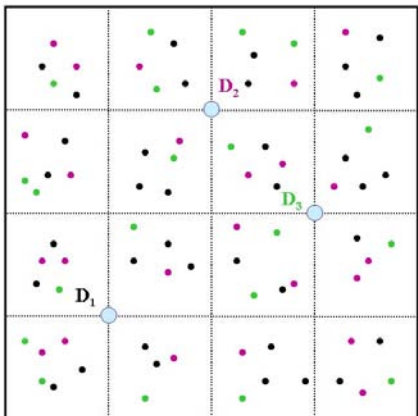

(a) Locating of mobile agent

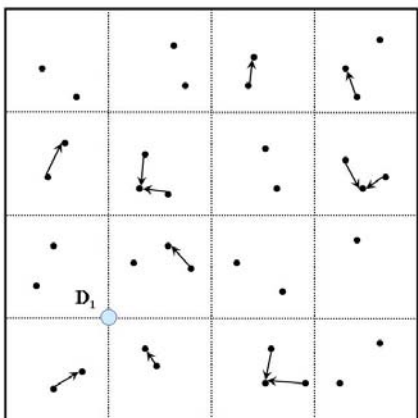

(b) Confirmation of intra-fused node

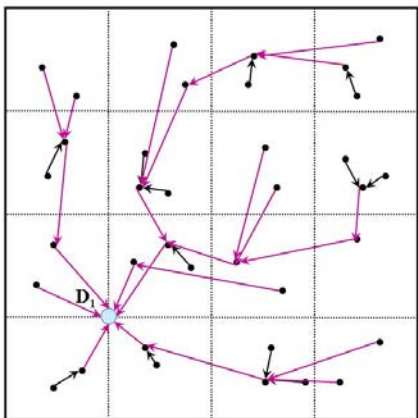

(c) Routes establishment of inter-grid
